# Supplementary material for: Loganin ameliorates acetaminophen-induced acute liver injury via targeting TOP1MT-mediated hepatocyte apoptosis and ferroptosis
Source: Research Square preprint supplement (doi:10.21203/rs.3.rs-3994000/v1), 2024-03-14
Supplement: Supplementary file 1 [file 8e0c065eb5cc09cef69cdb5f.docx]

**Supplementary Materials**


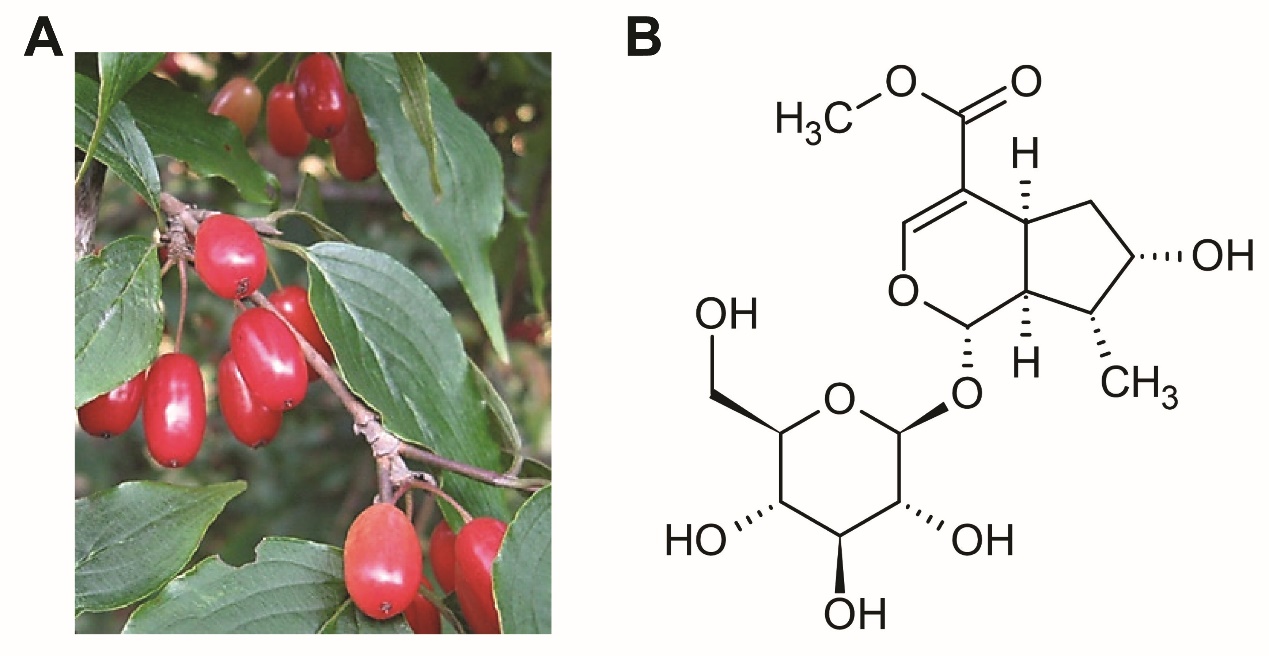


**Figure. S1.** Cornus officinalis plants with fruits (A) and the chemical structure of LOG (B)
